# Supplementary material for: Stability Precision Error Correction of Photoelectric Detection by Unmanned Aerial Vehicle
Source: Hindawi journal article supplement (doi:10.1155/2021/5564448), 2021-01-01
Supplement: f1 [file 5564448.f1.docx]

clear;

M =load('shuju.txt');

T=M(:,1);

xn=M(:,2);

figure(1);

plot(T,xn);

xlabel('time/s');

ylabel('acceleration/g');

nfft=1024;%FFT Points

Fs=5120; %sampling frequency

cxn=xcorr(xn,'unbiased'); %Calculating autocorrelation function of sequence

CXk=fft(cxn,nfft);%The power spectrum is obtained by fast Fourier transform

CX=CXk/Fs;%The power spectral density is obtained by dividing the power spectrum by the frequency

Pxx=abs(CX);%Take the amplitude

index=0:round(nfft/2-1);

k=index*Fs/nfft;

figure(2);

plot_Pxx=10*log10(Pxx(index+1));

plot(k,plot_Pxx,'LineWidth',2);

xlabel('frequency/Hz','FontSize',16);

ylabel('power spectrum/dB','FontSize',16);
