# Supplementary material for: Stability Precision Error Correction of Photoelectric Detection by Unmanned Aerial Vehicle
Source: Hindawi journal article supplement (doi:10.1155/2021/5564448), 2021-01-01
Supplement: f3 [file 5564448.f3.docx]

f=20:(1980/4096):2000;

Xk=0.1.*(f>=20&f<=2000);%The power spectrum function is described

figure(1);

plot(f,Xk);

N=2048;

fs=5120;

y=1:2048;

xn=Xk(y);%sampling

xk=(N*xn*fs).^0.5;

fik=randn(1,N)*2*pi;%Generate random sequences with uniform distribution from 0 to 2pi

Xk=xk.*exp(1i*fik);

Xk=[Xk(1:1025) conj(Xk(1024:-1:2))];%conjugate

Xm=ifft(Xk,N); %The complex random sequence is obtained by inverse Fourier transform

t=0:1/fs:(length(Xm)-1)/fs;

figure(2);

plot(t,real(Xm),'LineWidth',2);

xlabel('time/s','FontSize',16);

ylabel('acceleration/g','FontSize',16);
