# Supplementary figures and images for: Stability Precision Error Correction of Photoelectric Detection by Unmanned Aerial Vehicle
Source: Hindawi journal article supplement (doi:10.1155/2021/5564448), 2021-01-01

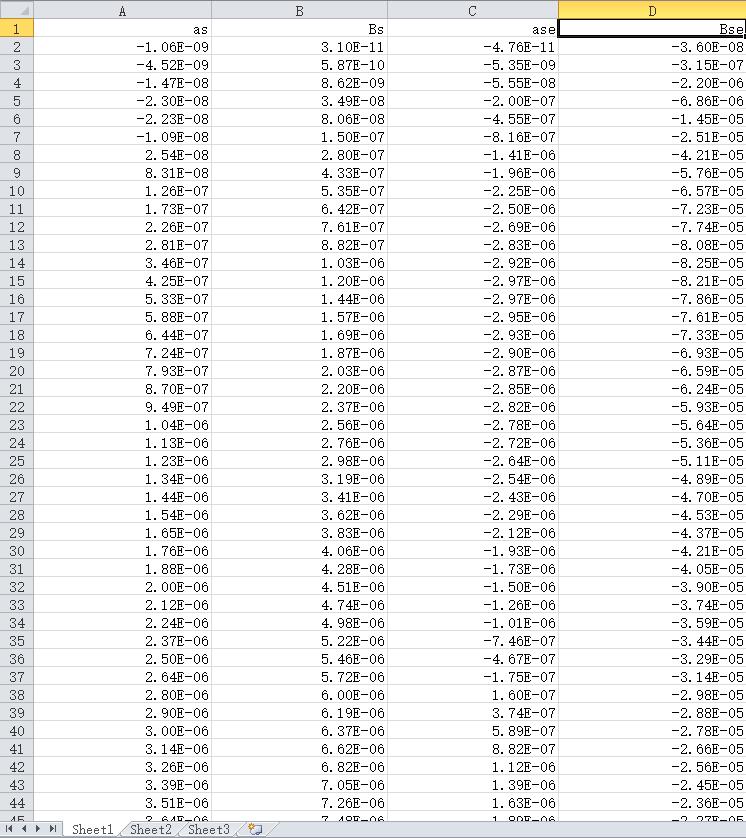

Supplement: f4 [file 5564448.f4.docx]
